# Supplementary material for: Enabling enhanced lithium storage capacity of two-dimensional pentagonal BN2 by aluminum doping
Source: Royal Society of Chemistry journal article supplement (doi:10.1039/d3tc00247k), 2023-01-01
Supplement: d3tc00247k1.pdf [file d3tc00247k1.pdf]

## Supplementary information for

# “Enabling Enhanced Lithium Storage Capacity of Two-Dimensional Pentagonal BN<sub>2</sub> by Aluminum Doping”

Thanasee Thanasarnsurapong,<sup>†</sup> Panyalak Detrattanawichai,<sup>†</sup> Klichchupong Dabsamut,<sup>†</sup>  
Kodchakorn Simalaotao,<sup>†</sup> Tosapal Maluangnont,<sup>‡</sup> and Adisak Boonchun<sup>\*†</sup>

<sup>†</sup>Department of Physics, Faculty of Science, Kasetsart University, Bangkok 10900, Thailand

<sup>‡</sup>Electroceramics Research Laboratory, College of Materials Innovation and Technology, King Mongkut's Institute of Technology Ladkrabang, Bangkok 10520, Thailand

\*E-mail: Adisak.bo@ku.th

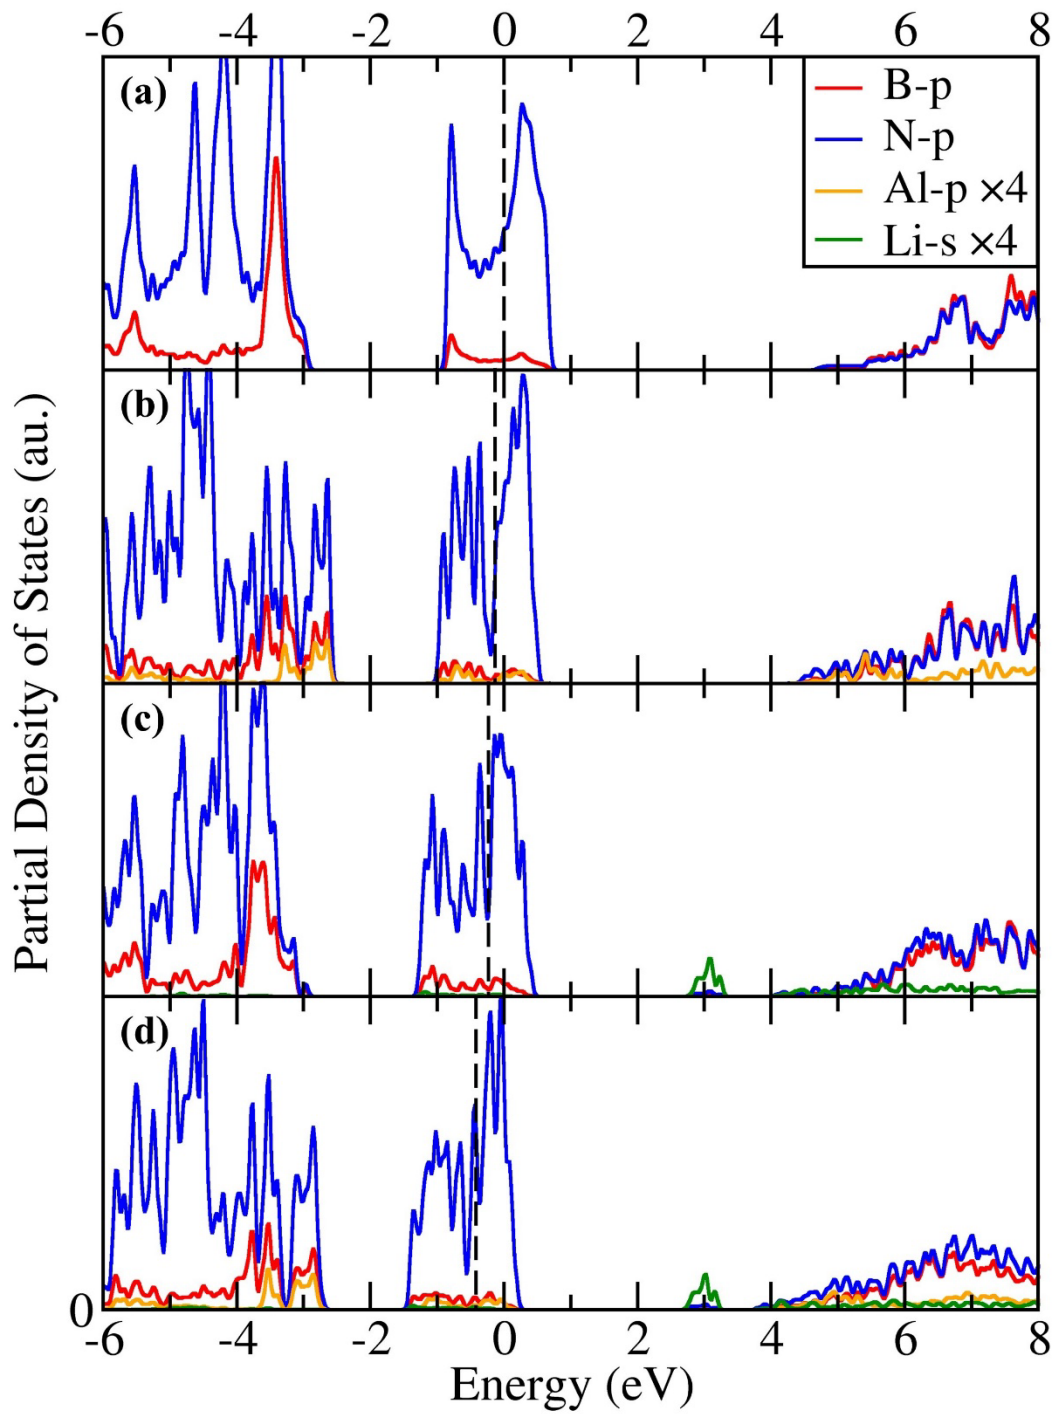

**Figure S1** Partial density of states (PDOS) of (a) *penta*-BN<sub>2</sub>, (b) Li absorbed on *penta*-BN<sub>2</sub>, (c) Al-doped *penta*-BN<sub>2</sub> and (d) Li absorbed on Al-doped *penta*-BN<sub>2</sub>
